# Supplementary material for: Practices and attitudes of doctors and patients to downward referral in Shanghai, China
Source: PubMed Central journal article supplement — BMJ Open. 2017 Apr 3;7(4):e012565. doi: 10.1136/bmjopen-2016-012565 (PMC5387945; doi:10.1136/bmjopen-2016-012565), 2017-04-03
Supplement: bmjopen-2016-012565supp1.pdf [file bmjopen-2016-012565supp1.pdf]

## **Supplementary material 1. A questionnaire on doctors' socio-demographic characteristics and practices and attitudes towards downward referral**

1. Gender

A. Male B. Female

2. Age

A. 20-29y B. 30-39y C. 40-49y D.  $\geq 50y$

3. Level of education

A. Junior college degree B. Bachelor's degree

C. Master's degree D. Doctor's degree

4. Professional title

A. Junior and others B. Intermediate C. Associate senior D. Senior

5. Department

A. Other department B. Medical technology

C. Internal medicine D. Surgery

6. How much do you know about the current situation of healthcare services provided by CHSs?

Note: Please select a number from 1 to 3 to represent the degree you know about the current situation. 1 means that you know nothing about it. As the increasing of the number, the degree of your knowledge of the situation is growing. 3 represents that your have fully understood it.

A. 1 B. 2 C. 3

7. Do you know the downward referral process?

Note: Please select a number from 1 to 3 to represent the degree you know about the process. 1 means that you know nothing about it. As the increasing of the number, the degree of your knowledge of the process is growing. 3 represents that your have fully understood it.

A. 1 B. 2 C. 3

8. Do you know which standard patients reach should they be referred from hospitals to CHSs?

Note: Please select a number from 1 to 3 to represent the degree you know about the standard. 1 means that you know nothing about it. As the increasing of the number, the degree of your knowledge of the standard is growing. 3 represents that your have fully understood it.

A. 1 B. 2 C. 3

9. Do you know that health resources in hospitals are limited and cannot meet all medical demands of every patient?

Note: Please select a number from 1 to 5 to represent the degree you know about the situation. 1 means that you know nothing about it. As the increasing of the number, the degree of your knowledge of the situation is growing. 5 represents that your have fully understood it.

A. 1    B. 2    C. 3    D. 4    E. 5

10. Do you think that downward referral will increase your workloads?

A. No            B. Yes

11. Do you have the willingness of downward referral when the patient meets the criteria of downward referral?

A. No            B. Yes
