# Supplementary material for: Practices and attitudes of doctors and patients to downward referral in Shanghai, China
Source: PubMed Central journal article supplement — BMJ Open. 2017 Apr 3;7(4):e012565. doi: 10.1136/bmjopen-2016-012565 (PMC5387945; doi:10.1136/bmjopen-2016-012565), 2017-04-03
Supplement: bmjopen-2016-012565supp2.pdf [file bmjopen-2016-012565supp2.pdf]

## **Supplementary material 2. A questionnaire on patients' socio-demographic characteristics and practices and attitudes towards downward referral**

1. Gender

A. Male B. Female

2. Occupation

A. Others            B. Medical staff            C. Civil servant            D. Retiree  
E. Farmer            F. Worker            G. Student

3. Age

A. <20y            B. 20-29y            C. 30-39y            D. 40-49y  
E. 50-59y            F. ≥60y

4. Average monthly income

A. <2,000 RMB            B. 2,000-2,999 RMB            C. 3,000-4,999 RMB  
D. 5,000-7,999 RMB            E. ≥8,000 RMB

5. Marital status

A. Divorced / widowed            B. Married            C. Single

6. Level of education

A. Primary degree and below            B. Junior high school degree            C. Senior school degree  
D. Junior college degree            E. Bachelor's degree and above

7. Annual medical expense

A. <1,000 RMB            B. 1,000-4,999 RMB  
C. 5,000-9,999 RMB            D. ≥10,000 RMB

8. Do you have any types of medical insurance (including Urban Employees' Basic Medical Insurance System, Urban Residents' Basic Medical Insurance System, New Rural Co-operative Medical Care System, and private health insurance)

A. No, I don't have.            B. Yes, I have.

9. Have you ever experienced downward referral (referral from hospitals to CHSs)?

A. No, I haven't experienced.            B. Yes, I have experienced.

10. To what extent do you think that healthcare services provided by CHSs can meet your medical demand?

Note: Please select a number from 1 to 5 to represent the degree you think that your medical demand met by healthcare services in CHSs. 1 means that your demand is completely unable to be met. As the increasing of the number, the degree your demand being met is growing. 5 represents that your demand can completely be met.

A. 1    B. 2    C. 3    D. 4    E. 5

11. Are you satisfied with healthcare services provided by CHSs?

Note: Please select a number from 1 to 5 to represent the degree you are satisfied with healthcare services provided by CHSs. 1 means that you are completely dissatisfied. As the increasing of the number, the degree of satisfaction is growing. 5 represents that your are completely satisfied.

A. 1    B. 2    C. 3    D. 4    E. 5

12. To what extent do you recognize the community first treatment system?

Note: Please select a number from 1 to 5 to represent the degree you recognize the community first treatment system. 1 means that you completely failed to recognize the system. As the increasing of the number, the degree of recognition is growing. 5 represents that your have completely recognized the system.

A. 1    B. 2    C. 3    D. 4    E. 5

13. Do you think whether medical cost can be saved when you are referred from hospitals to CHSs?

A. No, I don't think it can save money.      B. Yes, I think it can save money.

14. Are you willing to be referred from hospitals to CHSs when doctors make a downward referral suggestion?

A. No, I am not willing to.      B. Yes, I am willing to.
